# Supplementary material for: Targeting Apolipoprotein E/Amyloid β Binding by Peptoid CPO_Aβ17-21 P Ameliorates Alzheimer’s Disease Related Pathology and Cognitive Decline
Source: PubMed Central journal article supplement (PMC5556019; doi:10.1038/s41598-017-08604-8), 2017-08-14
Supplement: 41598_2017_8604_MOESM1_ESM.pdf [file 41598_2017_8604_MOESM1_ESM.pdf]

## Supplemental Information for

Targeting Apolipoprotein E/Amyloid  $\beta$  Binding by Peptoid CPO\_A $\beta$ 17-21P Ameliorates Alzheimer's Disease Related Pathology and Cognitive Decline

**Shan Liu<sup>1</sup>, Shinae Park<sup>2</sup>, Grant Allington<sup>3</sup>, Frances Prelli<sup>1</sup>, Yanjie Sun<sup>1</sup>, Mitchell Martá-Ariza<sup>1</sup>, Henrieta Scholtzova<sup>1</sup>, Goutam Biswas<sup>2</sup>, Bernard Brown<sup>1</sup>, Philip B. Verghese<sup>4</sup>, Pankaj D. Mehta<sup>5</sup>, Yong-Uk Kwon<sup>2\*</sup>, Thomas Wisniewski<sup>6\*</sup>**

<sup>1</sup>Center for Cognitive Neurology, Department of Neurology, New York University School of Medicine

<sup>2</sup>Department of Chemistry and Nanoscience, Ewha Womans University, Korea

<sup>3</sup>Department of Chemistry, New York University

<sup>4</sup>C2N Diagnostics, Center for Emerging Technologies, 4041 Forest Park Avenue, St. Louis, MO 63108

<sup>5</sup>Department of Immunology, New York State Institute for Basic Research in Developmental Disabilities

<sup>6</sup>Center for Cognitive Neurology, Departments of Neurology, Psychiatry and Pathology, Neuroscience Institute, New York University School of Medicine

\*co-corresponding authors:

Thomas Wisniewski

New York University School of Medicine

Alexandria ERSP, 450 East 29<sup>th</sup> Street

NYU School of Medicine, New York, NY, 10016 USA

e-mail: [Thomas.wisniewski@nyumc.org](mailto:Thomas.wisniewski@nyumc.org)

Yong-Uk Kwon

Department of Chemistry and Nanoscience,

Ewha Womans University,

Seoul 03760, Korea.

E-mail: yukwon@ewha.ac.kr

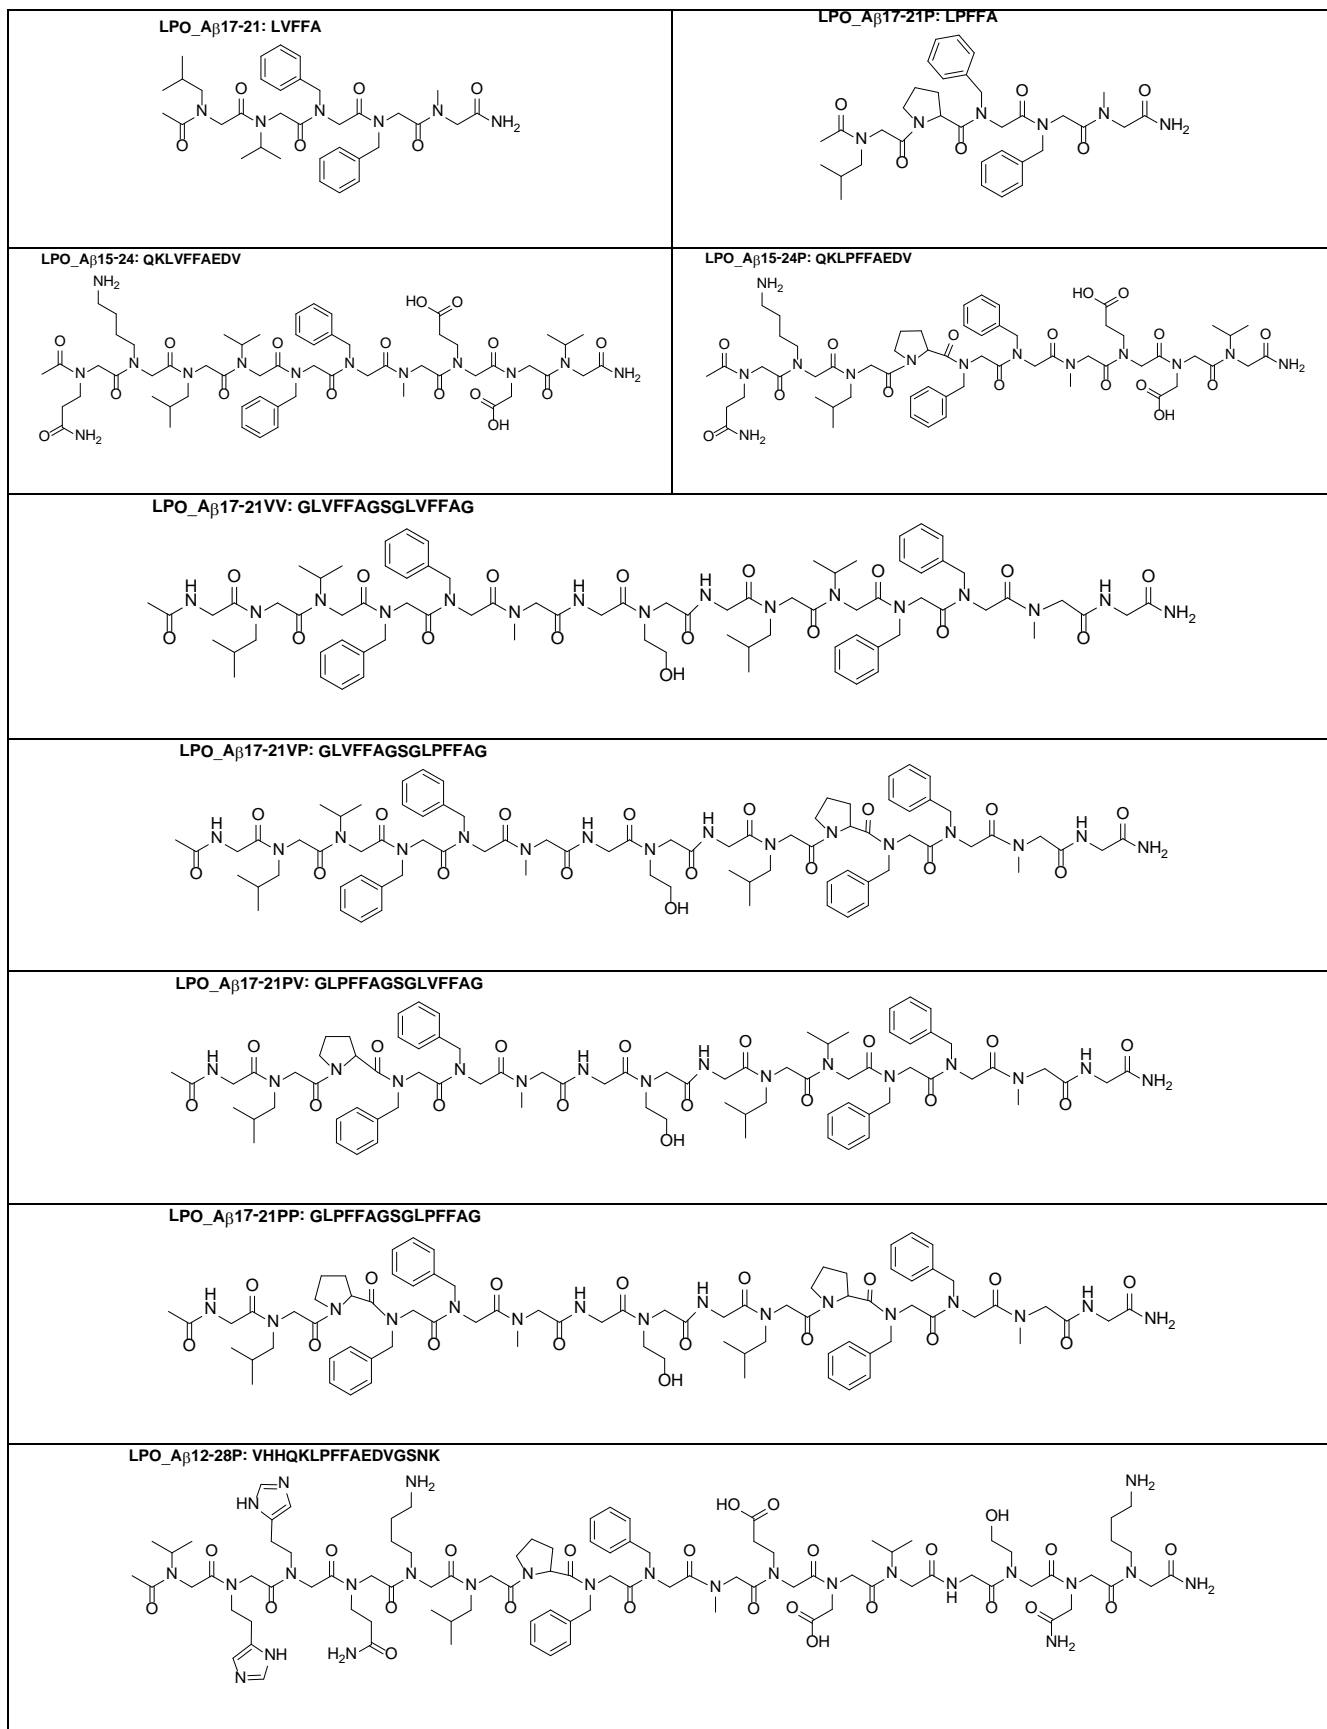

**Supplemental Figure 1**

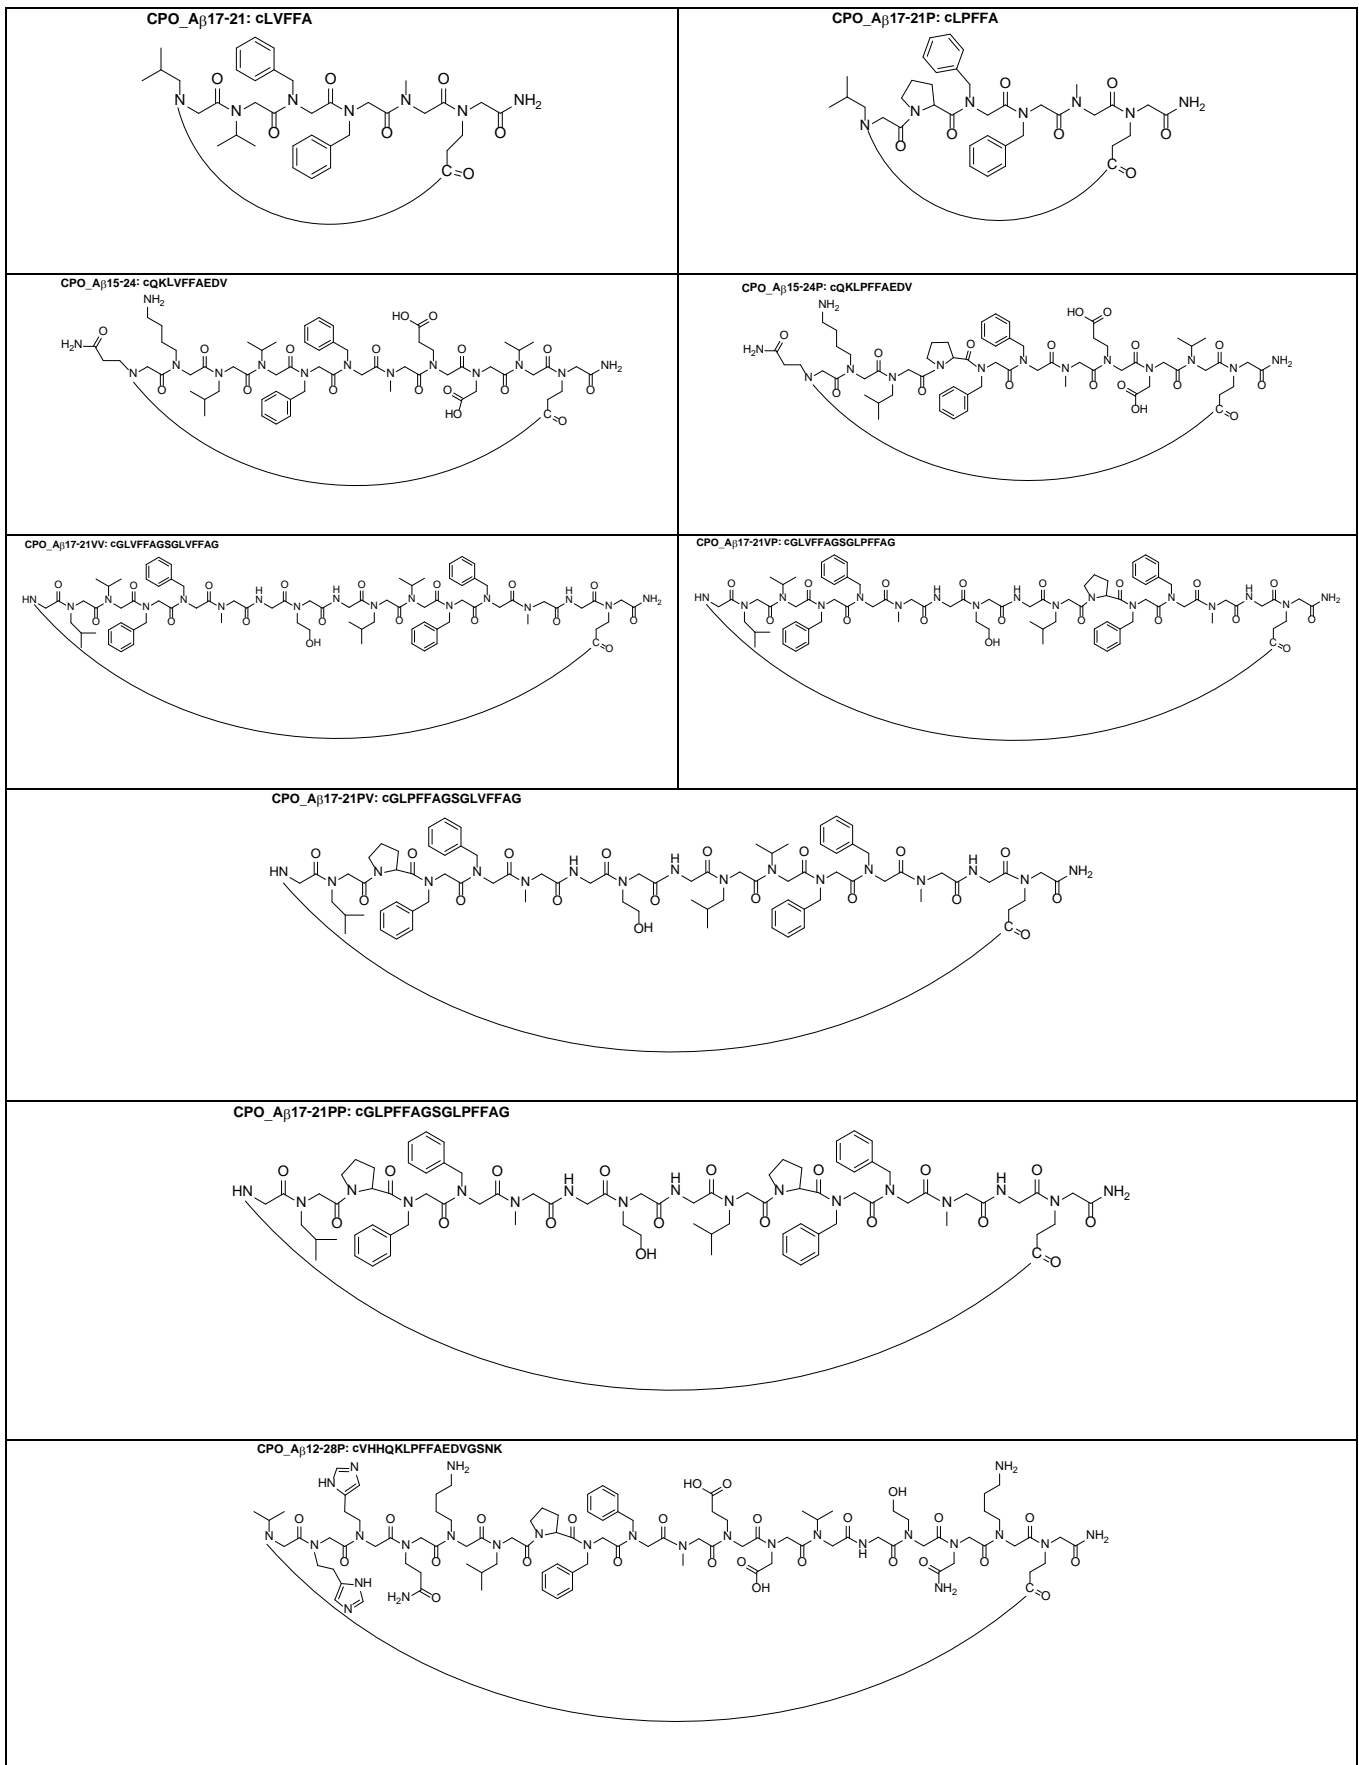

**Supplemental Figure 2**
